# Supplementary material
Source: PubMed Central journal article supplement (PMC3535913)
Supplement: AAC.01812-12_zac999101485so2.pdf [file AAC.01812-12_zac999101485so2.pdf]

**Table S1.** Number of days to first visible colonies for the 264 different conditions/samples of *Leptospira interrogans* strain NR-20157

| Type of agar <sup>a</sup> | Concentration of <i>Leptospira</i> inoculum (CFU/mL) | Number of days incubated in carbon dioxide prior to further incubation in air <sup>b</sup> |                    |     |     |     |     |                    |    |     |     |     |
|---------------------------|------------------------------------------------------|--------------------------------------------------------------------------------------------|--------------------|-----|-----|-----|-----|--------------------|----|-----|-----|-----|
|                           |                                                      | 0                                                                                          | 1% CO <sub>2</sub> |     |     |     |     | 5% CO <sub>2</sub> |    |     |     |     |
|                           |                                                      |                                                                                            | 1                  | 2   | 3   | 4   | 5   | 1                  | 2  | 3   | 4   | 5   |
| BA with 3% RS             | 10 <sup>2</sup>                                      | >28                                                                                        | 24                 | 20  | 20  | 24  | >28 | >28                | 21 | 22  | 25  | >28 |
| BA with 5% RS             | 10 <sup>2</sup>                                      | 24                                                                                         | 18                 | 20  | 20  | 24  | 25  | 20                 | 21 | 20  | 24  | >28 |
| BA with 10% RS            | 10 <sup>2</sup>                                      | 20                                                                                         | 16                 | 19  | 15  | 19  | 20  | 20                 | 19 | 17  | 20  | 21  |
| NA with 3% RS             | 10 <sup>2</sup>                                      | 17                                                                                         | 13                 | 14  | 12  | 13  | 19  | 13                 | 14 | 13  | 16  | 19  |
| NA with 5% RS             | 10 <sup>2</sup>                                      | >28                                                                                        | 20                 | 20  | 20  | 20  | 20  | 20                 | 20 | >28 | 20  | 24  |
| NA with 10% RS            | 10 <sup>2</sup>                                      | >28                                                                                        | 18                 | 18  | 20  | 20  | 20  | 20                 | 20 | 20  | 20  | 22  |
| BA with 3% RS             | 10 <sup>3</sup>                                      | 22                                                                                         | 15                 | 14  | 14  | 13  | 16  | 13                 | 25 | >28 | 19  | 20  |
| BA with 5% RS             | 10 <sup>3</sup>                                      | 21                                                                                         | 12                 | 12  | 12  | 12  | 12  | 12                 | 13 | 15  | 14  | 17  |
| BA with 10% RS            | 10 <sup>3</sup>                                      | >28                                                                                        | >28                | >28 | >28 | >28 | 14  | 22                 | 20 | 22  | >28 | 20  |
| NA with 3% RS             | 10 <sup>3</sup>                                      | >28                                                                                        | >28                | >28 | >28 | >28 | 13  | 14                 | 18 | 15  | 21  | 20  |
| NA with 5% RS             | 10 <sup>3</sup>                                      | 22                                                                                         | >28                | >28 | >28 | 12  | 12  | 13                 | 19 | 12  | 22  | 17  |
| NA with 10% RS            | 10 <sup>3</sup>                                      | 22                                                                                         | >28                | 17  | >28 | 10  | 10  | 12                 | 13 | 12  | 15  | 13  |
| BA with 3% RS             | 10 <sup>4</sup>                                      | >28                                                                                        | >28                | 20  | >28 | >28 | 22  | 25                 | 20 | 24  | 21  | 25  |
| BA with 5% RS             | 10 <sup>4</sup>                                      | 20                                                                                         | >28                | 18  | >28 | >28 | 22  | 18                 | 18 | 20  | 21  | 20  |
| BA with 10% RS            | 10 <sup>4</sup>                                      | 19                                                                                         | >28                | 13  | 15  | >28 | 19  | 15                 | 15 | 20  | 19  | 16  |
| NA with 3% RS             | 10 <sup>4</sup>                                      | 17                                                                                         | 12                 | 12  | 12  | >28 | 16  | 13                 | 13 | 15  | 16  | 13  |
| NA with 5% RS             | 10 <sup>4</sup>                                      | 20                                                                                         | 15                 | 14  | 14  | 20  | 21  | 18                 | 20 | 18  | 20  | 20  |
| NA with 10% RS            | 10 <sup>4</sup>                                      | 20                                                                                         | 14                 | 13  | 14  | 20  | 18  | 15                 | 18 | 17  | 20  | 20  |
| BA with 3% RS             | 10 <sup>5</sup>                                      | 16                                                                                         | 13                 | 12  | 13  | 13  | 13  | 13                 | 14 | 13  | 19  | 17  |
| BA with 5% RS             | 10 <sup>5</sup>                                      | 13                                                                                         | 12                 | 10  | 12  | 12  | 10  | 12                 | 12 | 12  | 13  | 13  |
| BA with 10% RS            | 10 <sup>5</sup>                                      | 18                                                                                         | 14                 | 14  | 14  | 18  | 14  | 13                 | 13 | 13  | 13  | 16  |
| NA with 3% RS             | 10 <sup>5</sup>                                      | 18                                                                                         | 13                 | 13  | 13  | 16  | 13  | 12                 | 12 | 12  | 12  | 16  |
| NA with 5% RS             | 10 <sup>5</sup>                                      | 13                                                                                         | 12                 | 12  | 12  | 12  | 12  | 11                 | 11 | 11  | 12  | 13  |
| NA with 10% RS            | 10 <sup>5</sup>                                      | 12                                                                                         | 10                 | 10  | 11  | 11  | 11  | 10                 | 10 | 10  | 10  | 11  |

<sup>a</sup> BA = Bacteriological agar base, NA= Noble agar base, RS = rabbit serum

<sup>b</sup> Initial incubation in CO<sub>2</sub> for 1 to 5 days was followed by incubation in air to a total of 28 days

\* Ten conditions yield lowest number of 10 days to first visible colonies (highlighted in yellow).

**Table S2. MIC of for 109 pathogenic *Leptospira* isolates as determined by the Etest**

| <i>Species</i>        | <i>Serovar</i> | <i>Country</i> | <i>Source</i> | <i>ST</i> <sup>a</sup> | <i>Strain</i> <sup>b</sup> | <i>PG</i> <sup>c</sup> | <i>Do</i> <sup>c</sup> | <i>CT</i> <sup>c</sup> | <i>TX</i> <sup>c</sup> | <i>C</i> <sup>c</sup> |
|-----------------------|----------------|----------------|---------------|------------------------|----------------------------|------------------------|------------------------|------------------------|------------------------|-----------------------|
| <i>L. interrogans</i> | Autumnalis     | Japan          | Human         | 27                     | Akiyami A                  | 0.002                  | 0.047                  | 0.002                  | 0.047                  | 0.75                  |
|                       | Autumnalis     | Lao PDR        | Human         | 34                     | UI13016                    | 0.032                  | 0.064                  | 0.012                  | 0.094                  | 0.5                   |
|                       | Autumnalis     | Lao PDR        | Human         | 34                     | UI12268                    | 0.047                  | 0.047                  | 0.023                  | 0.094                  | 1.5                   |
|                       | Autumnalis     | Lao PDR        | Human         | 34                     | UI15218                    | 0.032                  | 0.125                  | 0.023                  | 0.125                  | 1.5                   |
|                       | Autumnalis     | Lao PDR        | Human         | 34                     | U 018597                   | 0.012                  | 0.032                  | 0.004                  | 0.064                  | 0.125                 |
|                       | Autumnalis     | Lao PDR        | Human         | 34                     | UI12830                    | 0.016                  | 0.064                  | 0.023                  | 0.125                  | 1.5                   |
|                       | Autumnalis     | Thailand       | Human         | 22                     | NR-20161*                  | 0.023                  | 0.064                  | 0.008                  | 0.125                  | 1                     |
|                       | Autumnalis     | Thailand       | Human         | 34                     | UT285                      | 0.016                  | 0.094                  | 0.012                  | 0.125                  | 1                     |
|                       | Autumnalis     | Thailand       | Human         | 34                     | L0910                      | 0.016                  | 0.064                  | 0.023                  | 0.25                   | 0.5                   |
|                       | Autumnalis     | Thailand       | Human         | 34                     | L0474                      | 0.016                  | 0.19                   | 0.016                  | 0.19                   | 1.5                   |
|                       | Autumnalis     | Thailand       | Human         | 34                     | L0468                      | 0.047                  | 0.064                  | 0.016                  | 0.38                   | 1                     |
|                       | Autumnalis     | Thailand       | Human         | 34                     | L1000                      | 0.032                  | 0.064                  | 0.012                  | 0.19                   | 1.5                   |
|                       | Autumnalis     | Thailand       | Human         | 34                     | L1118                      | 0.016                  | 0.094                  | 0.016                  | 0.125                  | 0.38                  |
|                       | Autumnalis     | Thailand       | Human         | 34                     | L1160                      | 0.032                  | 0.047                  | 0.002                  | 0.064                  | 1                     |
|                       | Autumnalis     | Thailand       | Human         | 34                     | RY21                       | 0.016                  | 0.125                  | 0.016                  | 0.25                   | 2                     |
|                       | Autumnalis     | Thailand       | Human         | 34                     | L0020                      | 0.016                  | 0.032                  | 0.008                  | 0.064                  | 0.5                   |
|                       | Autumnalis     | Thailand       | Human         | 34                     | L0036                      | 0.023                  | 0.047                  | 0.012                  | 0.19                   | 0.75                  |
|                       | Autumnalis     | Thailand       | Human         | 34                     | L0521                      | 0.032                  | 0.064                  | 0.032                  | 0.19                   | 1                     |
|                       | Autumnalis     | Thailand       | Human         | 34                     | L0528                      | 0.032                  | 0.064                  | 0.012                  | 0.19                   | 0.75                  |
|                       | Autumnalis     | Thailand       | Human         | 34                     | L0562                      | 0.012                  | 0.047                  | 0.012                  | 0.094                  | 0.5                   |
|                       | Autumnalis     | Thailand       | Human         | 34                     | UT667                      | 0.012                  | 0.064                  | 0.006                  | 0.094                  | 0.5                   |
|                       | Autumnalis     | Thailand       | Human         | 34                     | UT571                      | 0.012                  | 0.032                  | 0.006                  | 0.064                  | 0.38                  |
|                       | Autumnalis     | Thailand       | Human         | 34                     | UT226                      | 0.008                  | 0.047                  | 0.016                  | 0.064                  | 1.5                   |
|                       | Autumnalis     | Thailand       | Human         | 34                     | L1104                      | 0.008                  | 0.032                  | 0.008                  | 0.125                  | 0.5                   |
|                       | Autumnalis     | Thailand       | Human         | 34                     | L0752                      | 0.047                  | 0.125                  | 0.064                  | 0.5                    | 1.5                   |
|                       | Autumnalis     | Thailand       | Human         | 34                     | UT294                      | 0.012                  | 0.064                  | 0.023                  | 0.125                  | 0.75                  |
|                       | Autumnalis     | Thailand       | Human         | 34                     | UT105                      | 0.023                  | 0.064                  | 0.016                  | 0.125                  | 1                     |
|                       | Autumnalis     | Thailand       | Human         | 34                     | UT227                      | 0.023                  | 0.023                  | 0.002                  | 0.047                  | 0.25                  |
|                       | Autumnalis     | Thailand       | Human         | 34                     | UT560                      | 0.023                  | 0.125                  | 0.016                  | 0.094                  | 1                     |
|                       | Autumnalis     | Thailand       | Human         | 34                     | UT567                      | 0.023                  | 0.023                  | 0.006                  | 0.006                  | 0.75                  |
|                       | Autumnalis     | Thailand       | Human         | 34                     | L0088                      | 0.008                  | 0.047                  | 0.003                  | 0.016                  | 0.75                  |
|                       | Autumnalis     | Thailand       | Human         | 34                     | L0382                      | 0.023                  | 0.064                  | 0.006                  | 0.032                  | 0.5                   |
|                       | Autumnalis     | Thailand       | Human         | 34                     | L0388                      | 0.002                  | 0.023                  | 0.016                  | 0.094                  | 0.125                 |
|                       | Autumnalis     | Thailand       | Human         | 34                     | L0615                      | 0.75                   | 0.064                  | 0.047                  | 0.5                    | 1.5                   |
|                       | Autumnalis     | Thailand       | Human         | 34                     | L0810                      | 0.002                  | 0.032                  | 0.002                  | 0.094                  | 0.38                  |
|                       | Autumnalis     | Thailand       | Human         | 34                     | L0984                      | 0.032                  | 0.094                  | 0.006                  | 0.094                  | 1.5                   |
|                       | Autumnalis     | Thailand       | Human         | 34                     | L1229                      | 0.047                  | 0.094                  | 0.002                  | 0.064                  | 1                     |
|                       | Autumnalis     | Thailand       | Human         | 34                     | L1059                      | 0.023                  | 0.047                  | 0.012                  | 0.19                   | 0.75                  |
|                       | Autumnalis     | Thailand       | Human         | 34                     | L1064                      | 0.008                  | 0.064                  | 0.016                  | 0.125                  | 1                     |
|                       | Autumnalis     | Thailand       | Human         | 34                     | L1254                      | 0.016                  | 0.064                  | 0.016                  | 0.19                   | 0.75                  |

| <i>Species</i>        | <i>Serovar</i>      | <i>Country</i> | <i>Source</i> | <i>ST</i> | <i>Strain</i>  | <i>PG</i> | <i>Do</i> | <i>CT</i> | <i>TX</i> | <i>C</i> |
|-----------------------|---------------------|----------------|---------------|-----------|----------------|-----------|-----------|-----------|-----------|----------|
| <i>L. interrogans</i> | Autumnalis          | Thailand       | Human         | 34        | LP085          | 0.047     | 0.064     | 0.016     | 0.094     | 2        |
|                       | Autumnalis          | Thailand       | Human         | 34        | YT12           | 0.094     | 0.19      | 0.012     | 0.064     | 1.5      |
|                       | Autumnalis          | Thailand       | Human         | 34        | UT108          | 0.032     | 0.19      | 0.094     | 0.38      | 3        |
|                       | Autumnalis          | Thailand       | Human         | 34        | UT670          | 0.016     | 0.125     | 0.023     | 0.19      | 2        |
|                       | Autumnalis          | Thailand       | Human         | 34        | L0013          | 0.023     | 0.064     | 0.012     | 0.125     | 1.5      |
|                       | Autumnalis          | Thailand       | Human         | 34        | L0607          | 0.032     | 0.064     | 0.023     | 0.125     | 1        |
|                       | Autumnalis          | Thailand       | Human         | 34        | L1190          | 0.002     | 0.125     | 0.002     | 0.006     | 1        |
|                       | Autumnalis          | Thailand       | Human         | 34        | L0015          | 0.004     | 0.047     | 0.002     | 0.032     | 0.094    |
|                       | Bataviae            | Lao PDR        | Human         | 79        | NR-20168*      | 0.047     | 0.125     | 0.032     | 0.75      | 1        |
|                       | Bataviae            | Thailand       | Human         | 42        | NR-20159*      | 0.047     | 0.094     | 0.032     | 0.38      | 1        |
|                       | Bataviae            | Thailand       | Human         | 59        | UT075          | 0.094     | 0.125     | 0.023     | 0.5       | 2        |
|                       | Bataviae            | Thailand       | Human         | 46        | NR-20325*      | 0.047     | 0.094     | 0.016     | 0.094     | 0.5      |
|                       | Bataviae            | Thailand       | Human         | 46        | UT229          | 0.064     | 0.125     | 0.012     | 0.25      | 1.5      |
|                       | Canicola            | Lao PDR        | Human         | 37        | NR-20170*      | 0.047     | 0.25      | 0.047     | 0.38      | 0.75     |
|                       | Canicola            | Lao PDR        | Human         | 37        | UI9661         | 0.047     | 0.125     | 0.032     | 0.25      | 1        |
|                       | Canicola            | Lao PDR        | Human         | 37        | UI12823        | 0.125     | 0.19      | 0.064     | 0.5       | 1.5      |
|                       | Grippotyphosa       | Lao PDR        | Human         | 82        | NR-20166       | 0.047     | 0.25      | 0.032     | 0.38      | 0.75     |
|                       | Grippotyphosa       | Lao PDR        | Human         | 85        | NR-20174*      | 0.002     | 0.25      | 0.032     | 2         | 2        |
|                       | Grippotyphosa       | Lao PDR        | Human         | 77        | NR-20165*      | 0.047     | 0.125     | 0.023     | 0.25      | 2        |
|                       | Grippotyphosa       | Lao PDR        | Human         | 86        | NR-20175*      | 0.047     | 0.19      | 0.064     | 0.25      | 0.75     |
|                       | Hardjo              | Indonesia      | Human         | 20        | Hardjoprajitno | 0.003     | 0.094     | 0.016     | 0.75      | 2        |
|                       | Hebdomadis          | Sri Lanka      | Human         | 80        | NR-20164*      | 0.023     | 0.047     | 0.023     | 0.25      | 0.5      |
|                       | Icterohaemorrhagiae | Belgium        | Human         | NA        | RGA            | 0.012     | 0.047     | 0.004     | 0.064     | 0.25     |
|                       | Lai                 | China          | Human         | 1         | Lai            | 0.064     | 0.064     | 0.125     | 1.5       | 1.5      |
|                       | Medanensis          | Thailand       | Human         | 46        | NR-20178*      | 0.032     | 0.125     | 0.032     | 0.25      | 0.75     |
|                       | Medanensis          | Thailand       | Human         | 46        | NR-20184*      | 0.047     | 0.19      | 0.094     | 0.5       | 2        |
|                       | Medanensis          | Thailand       | Human         | 46        | NR-20326*      | 0.023     | 0.125     | 0.012     | 0.25      | 1        |
|                       | Medanensis          | Thailand       | Human         | 46        | L0941          | 0.006     | 0.094     | 0.003     | 0.012     | 0.25     |
|                       | Pomona              | Thailand       | Human         | 38        | NR-20180*      | 0.008     | 0.064     | 0.016     | 0.064     | 0.75     |
|                       | Pyrogenes           | Lao PDR        | Human         | 37        | UI8414         | 0.094     | 0.094     | 0.032     | 0.094     | 0.38     |
|                       | Pyrogenes           | Lao PDR        | Human         | 37        | UI12344        | 0.094     | 0.19      | 0.047     | 0.38      | 1        |
|                       | Pyrogenes           | Sri Lanka      | Human         | 49        | NR-20163*      | 0.032     | 0.125     | 0.003     | 0.19      | 1.5      |
|                       | Pyrogenes           | Sri Lanka      | Human         | 74        | R163           | 1         | 0.38      | 0.023     | 0.012     | 0.094    |
|                       | Pyrogenes           | Sri Lanka      | Human         | 49        | R480           | 0.047     | 0.064     | 0.012     | 0.125     | 0.75     |
|                       | Pyrogenes           | Sri Lanka      | Human         | 49        | R358           | 0.016     | 0.094     | 0.003     | 0.094     | 1        |
|                       | Pyrogenes           | Sri Lanka      | Human         | 75        | R493           | 0.047     | 0.094     | 0.016     | 0.125     | 0.75     |
|                       | Pyrogenes           | Sri Lanka      | Human         | 75        | R601           | 0.006     | 0.047     | 0.023     | 0.094     | 1        |
|                       | Pyrogenes           | Thailand       | Human         | 49        | NR-20157*      | 0.064     | 0.25      | 0.094     | 0.75      | 1.5      |
|                       | Pyrogenes           | Thailand       | Human         | 49        | L0784          | 0.047     | 0.5       | 0.032     | 1         | 2        |
|                       | Pyrogenes           | Thailand       | Human         | 37        | UD009          | 0.094     | 0.25      | 0.012     | 0.125     | 1        |
|                       | Unknown             | Lao PDR        | Human         | 84        | NR-20173*      | 0.023     | 0.064     | 0.023     | 0.38      | 0.75     |
| Unknown               | Lao PDR             | Human          | 87            | NR-20177* | 0.002          | 0.094     | 0.008     | 0.38      | 0.75      |          |
| Unknown               | Lao PDR             | Human          | 46            | NR-20167* | 0.023          | 0.125     | 0.016     | 0.094     | 1.5       |          |

| <i>Species</i>           | <i>Serovar</i> | <i>Country</i> | <i>Source</i> | <i>ST</i> | <i>Strain</i> | <i>PG</i> | <i>Do</i> | <i>CT</i> | <i>TX</i> | <i>C</i> |
|--------------------------|----------------|----------------|---------------|-----------|---------------|-----------|-----------|-----------|-----------|----------|
| <i>L. interrogans</i>    | Unknown        | Lao PDR        | Human         | 83        | NR-20172*     | 0.023     | 0.047     | 0.003     | 0.032     | 1        |
|                          | Unknown        | Lao PDR        | Human         | 38        | UI15191       | 0.023     | 0.047     | 0.016     | 0.125     | 1.5      |
|                          | Unknown        | Lao PDR        | Human         | NA        | UI15253       | 0.032     | 0.094     | 0.032     | 0.125     | 1        |
|                          | Unknown        | Sri Lanka      | Human         | 76        | R457          | 0.047     | 0.19      | 0.032     | 0.38      | 1.5      |
|                          | Unknown        | Sri Lanka      | Human         | 75        | R444          | 0.006     | 0.094     | 0.012     | 0.064     | 0.25     |
|                          | Unknown        | Thailand       | Human         | 40        | NR-20179*     | 0.016     | 0.064     | 0.023     | 0.25      | 1        |
|                          | Unknown        | Thailand       | Human         | 46        | NR-20158*     | 0.047     | 0.19      | 0.047     | 0.38      | 2        |
|                          | Unknown        | Thailand       | Human         | 71        | NR-20156*     | 0.016     | 0.023     | 0.016     | 0.19      | 0.19     |
|                          | Unknown        | Thailand       | Human         | 35        | NR-20153*     | 0.012     | 0.032     | 0.016     | 0.094     | 0.75     |
|                          | Wolffi         | Lao PDR        | Human         | NA        | LNT1691       | 0.002     | 0.064     | 0.002     | 0.032     | 1.5      |
| Wolffi                   | Thailand       | Human          | 47            | NR-20154* | 0.023         | 0.19      | 0.008     | 0.047     | 1.5       |          |
| <i>L. borgpetersenii</i> | Ballum         | Denmark        | Animal        | NA        | Mus 127       | 0.008     | 0.19      | 0.006     | 0.125     | 2        |
|                          | Javanica       | Thailand       | Human         | NA        | NR-20151*     | 0.012     | 0.19      | 0.006     | 0.032     | 0.75     |
|                          | Javanica       | Thailand       | Human         | NA        | NR-20150*     | 0.004     | 0.094     | 0.006     | 0.047     | 0.75     |
|                          | Javanica       | Indonesia      | Animal        | NA        | ATCC 23479    | 0.012     | 0.125     | 0.006     | 0.064     | 2        |
|                          | Unknown        | Lao PDR        | Human         | NA        | NR-20169*     | 0.006     | 0.064     | 0.023     | 0.125     | 0.5      |
|                          | Unknown        | Lao PDR        | Human         | NA        | NR-20171*     | 0.002     | 0.094     | 0.002     | 0.064     | 0.75     |
| <i>L. inadai</i>         | Lyme           | USA            | Human         | NA        | ATCC 43289    | 0.064     | 0.19      | 0.064     | 0.38      | 2        |
| <i>L. kirschneri</i>     | Cynopteri      | Indonesia      | Animal        | 70        | 3522C         | 0.003     | 0.047     | 0.006     | 0.19      | 0.5      |
|                          | Grippotyphosa  | Thailand       | Human         | 68        | NR-20327*     | 0.023     | 0.064     | 0.032     | 0.125     | 1        |
|                          | Grippotyphosa  | Thailand       | Human         | 68        | NR-20155*     | 0.047     | 0.125     | 0.023     | 0.064     | 1        |
| <i>L. weilii</i>         | Sarmin         | Indonesia      | Human         | NA        | Sarmin        | 0.003     | 0.19      | 0.008     | 0.75      | 1.5      |
|                          | Unknown        | Lao PDR        | Human         | NA        | NR-20181*     | 0.012     | 0.094     | 0.002     | 0.047     | 0.5      |
|                          | Unknown        | Lao PDR        | Human         | NA        | NR-20176*     | 0.008     | 0.125     | 0.012     | 0.094     | 0.38     |
|                          | Unknown        | Lao PDR        | Human         | NA        | NR-20182*     | 0.016     | 0.125     | 0.004     | 0.008     | 0.75     |
|                          | Unknown        | Lao PDR        | Human         | NA        | NR-20183*     | 0.032     | 0.125     | 0.016     | 0.064     | 1.5      |

<sup>a</sup> ST = Sequence type determined by multilocus sequence typing (MLST), N/A = Not available

<sup>b</sup> PG = Penicillin G (units/ml), Do = Doxycycline ( $\mu\text{g/ml}$ ), CT = Cefotaxime ( $\mu\text{g/ml}$ ), TX = Ceftriaxone ( $\mu\text{g/ml}$ ), C = Chloramphenicol ( $\mu\text{g/ml}$ )

\* NR represents strains deposited with BioDefense and Emerging Infections Research Resources Repository (n=35)
